# Supplementary material for: Primary results from the CLEAR study of a novel stent retriever with drop zone technology
Source: PubMed Central journal article supplement — J Neurointerv Surg. 2023 Dec 2;16(12):e020960. doi: 10.1136/jnis-2023-020960 (PMC11671885; doi:10.1136/jnis-2023-020960), 2023-12-02
Supplement: jnis-16-12-s001.pdf [file jnis-16-12-s001.pdf]

**Primary Results from the CLEAR Study of a Novel Stent Retriever with Drop Zone Technology**

**Supplementary Materials**

## **SUPPLEMENTARY MATERIALS**

**Supplementary Figure 1. Subject Disposition**

**Supplementary Table 1. Inclusion/Exclusion Criteria**

**Supplementary Table 2. List of CLEAR Study Investigators**

**Supplementary Table 3. Modified Intent to Treat Devices and Device Characteristics**

**Supplementary Table 4. Reasons for Exclusion from mITT Population**

**Supplementary Table 5. Study Procedure Characteristics**

**Supplementary Table 6. Primary Endpoint Subgroup Analyses in mITT Population**

**Supplementary Table 7. Overview of CEC Adverse Event Adjudications (ITT/Safety population)**

**Supplementary Table 8. CEC Adjudicated Serious Adverse Events – Relatedness (ITT/Safety population)**

**Supplementary Table 9. CEC Adjudicated Adverse Events - Summary (ITT/Safety population)**

**Supplementary Table 10. Safety Endpoint ITT and mITT Populations**

**Supplementary Table 11. Patient characteristics in CLEAR and comparator device registration trials**

**Supplementary Figure 1. Subject Disposition**

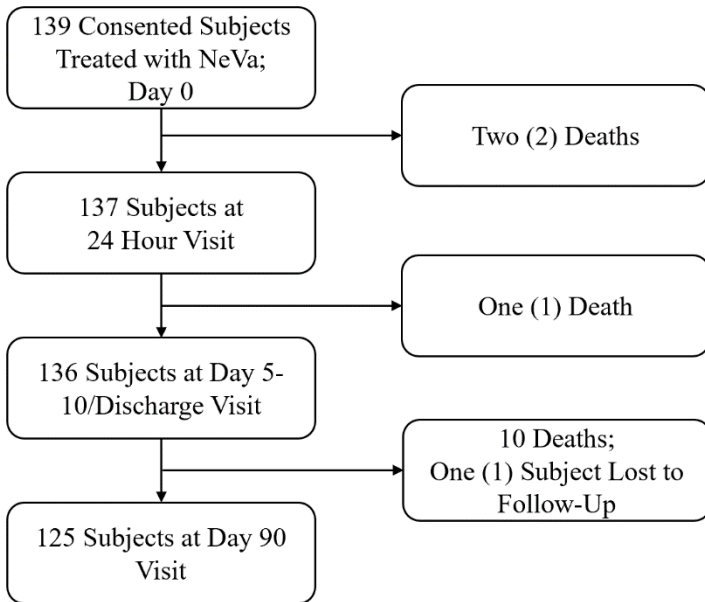

## Supplementary Table 1. Inclusion/Exclusion Criteria

### Inclusion Criteria

---

Subjects were required to meet all inclusion criteria:

1. Clinical signs and symptoms consistent with the diagnosis of an acute ischemic stroke, and subject belonged to one of the following subgroups:
  - 1.1. Subject failed IV t-PA therapy
  - 1.2. Subject was contraindicated for IV t-PA administration
  - 1.3. IV-tPA administered within 3 hours of symptom onset
2. Age  $\geq 18$  and  $< 85$  years
3. NIHSS score  $\geq 8$  and  $\leq 25$
4. Prestroke mRS score of  $\leq 1$
5. Intracranial arterial occlusion of the intracranial carotid artery, middle cerebral artery (M1/M2), anterior cerebral artery (ACA), posterior cerebral artery (PCA), basilar artery, or vertebral artery demonstrated with DSA.
6. Thrombectomy procedure initiated within 8 hours of symptom onset with at least one NeVa pass occurring before 8 hours
7. Imaging Inclusion Criteria:
  - 7.1. Non-Contrast CT Selection (if CT Perfusion or MRI not utilized):
  - 7.2. ASPECTS 6-10, or CT Perfusion core  $\leq 50$  cc , or
  - 7.3. MRI DWI core  $\leq 50$  cc
8. Subject or legal representative was able and willing to give informed consent prior to the intervention.

### Exclusion Criteria

---

Subjects were not eligible for the study if any of the following criteria were present:

1. Pre-existing medical neurological or psychiatric disease that would confound the neurological or functional evaluations, e.g., dementia with prescribed anti-cholinesterase inhibitor (e.g., Aricept)
2. Cardiopulmonary resuscitation, cardiac arrhythmia resulting in hemodynamic instability (hypotension) that was not easily medically correctable, evidence of ongoing myocardial infarction, concern for pre-treatment pulmonary aspiration.
3. Clinical symptoms suggestive of bilateral stroke or stroke in multiple territories
4. Cerebral vasculitis
5. History of severe allergy to contrast medium
6. Known allergy to NeVa materials (nitinol, stainless steel)
7. Suspicion of aortic dissection, septic embolus, or bacterial endocarditis
8. Systemic infection
9. Significant mass effect with midline shift
10. Evidence of intracranial tumor (except small meningioma [ $\leq 3$  cm])
11. Any CT or MRI evidence of acute hemorrhage products on presentation.
12. Inability to deploy NeVa device for at least one pass for any other reason
13. Life expectancy less than 6 months

14. Any other condition that, in the opinion of the investigator, precluded an endovascular procedure or posed a significant hazard to the subject if an endovascular procedure was performed.
15. Females who were pregnant or breastfeeding
16. Known active malignancy
17. Stenosis or occlusion in a proximal vessel requiring treatment or preventing access to thrombus.

**Supplementary Table 2. List of CLEAR Study Investigators**

{Blinded}

|                                      |  |
|--------------------------------------|--|
| <b>Trial Principal Investigators</b> |  |
|                                      |  |
| <b>Steering Committee</b>            |  |
|                                      |  |
|                                      |  |
|                                      |  |
|                                      |  |
|                                      |  |
|                                      |  |
| <b>Clinical Events Committee</b>     |  |
|                                      |  |
| <b>Imaging Core Lab</b>              |  |

| Country | Site             | Name | Role  | ITT enrollment | MITT enrollment |            |
|---------|------------------|------|-------|----------------|-----------------|------------|
|         | <b>{Blinded}</b> |      | PI    | 3 (2.2%)       | 3 (2.8%)        |            |
|         |                  |      | Sub-I |                |                 |            |
|         |                  |      | Sub-I |                |                 |            |
|         |                  |      |       | PI             | 5 (3.6%)        | 5 (4.7%)   |
|         |                  |      |       | Sub-I          |                 |            |
|         |                  |      |       | PI             | 2 (1.4%)        | 1 (0.9%)   |
|         |                  |      |       | Sub-I          |                 |            |
|         |                  |      |       | PI             | 1 (0.7%)        | 1 (0.9%)   |
|         |                  |      |       | Sub-I          |                 |            |
|         |                  |      |       | Sub-I          |                 |            |
|         |                  |      |       | PI             | 4 (2.9%)        | 4 (3.7%)   |
|         |                  |      |       | Sub-I          |                 |            |
|         |                  |      |       | Sub-I          |                 |            |
|         |                  |      |       | Sub-I          |                 |            |
|         |                  |      |       | Sub-I          |                 |            |
|         |                  |      |       | PI             | 5 (3.6%)        | 4 (3.7%)   |
|         |                  |      |       | PI             | 13 (9.4%)       | 12 (11.2%) |
|         |                  |      |       | Sub-I          |                 |            |
|         |                  |      | Sub-I |                |                 |            |
|         |                  |      | PI    | 2 (1.4%)       | 2 (1.9%)        |            |
|         |                  |      | Sub-I |                |                 |            |
|         |                  |      | Sub-I |                |                 |            |
|         |                  |      | Sub-I |                |                 |            |
|         |                  |      | PI    | 12 (8.6%)      | 11 (10.3%)      |            |
|         |                  |      | Sub-I |                |                 |            |
|         |                  |      | Sub-I |                |                 |            |
|         |                  |      | PI    | 8 (5.8%)       | 8 (7.5%)        |            |
|         |                  |      | Sub-I |                |                 |            |

|  |
|--|
|  |
|  |
|  |
|  |

{Blinded}

|  |             |          |          |
|--|-------------|----------|----------|
|  | Sub-I       |          |          |
|  | PI          |          |          |
|  | Sub-I       | 4 (2.9%) | 4 (3.7%) |
|  | Sub-I       |          |          |
|  | Sub-I       |          |          |
|  | PI          |          |          |
|  | Sub-I       | 3 (2.2%) | 3 (2.8%) |
|  | Sub-I       |          |          |
|  | PI          |          |          |
|  | PI (former) |          |          |
|  | Sub-I       | 3 (2.2%) | 3 (2.8%) |
|  | Sub-I       |          |          |





{Blinded}

|  |                 |            |          |
|--|-----------------|------------|----------|
|  | Co-investigator |            |          |
|  | Co-investigator |            |          |
|  | PI              | 20 (14.4%) | 9 (8.4%) |
|  | PI              | 3 (2.2%)   | 1 (0.9%) |
|  | Co-investigator |            |          |
|  | PI              | 6 (4.3%)   | 1 (0.9%) |
|  | Co-investigator |            |          |
|  | PI              | 2 (1.4%)   | 2 (1.9%) |

**{Blinded}**

|  |                 |          |          |
|--|-----------------|----------|----------|
|  | Co-investigator |          |          |
|  | Co-investigator |          |          |
|  | PI              |          |          |
|  | Co-investigator | 8 (5.8%) | 6 (5.6%) |
|  | Co-Investigator |          |          |
|  | PI              |          |          |
|  | Co-Investigator | 3 (2.2%) | 3 (2.8%) |
|  | Co-Investigator |          |          |
|  | Co-Investigator |          |          |
|  | Co-Investigator |          |          |
|  | PI              | 6 (4.3%) | 6 (5.6%) |

**Supplementary Table 3. Modified Intent to Treat Devices and Device Characteristics**

| <b>Stent Retriever Model</b> | <b>Retriever Diameter</b> | <b>Retriever Length</b> | <b>Retriever Working Distance</b> | <b>Intended Occlusions for Treatment</b>                                 | <b>Intended Vessel Size Range</b> |
|------------------------------|---------------------------|-------------------------|-----------------------------------|--------------------------------------------------------------------------|-----------------------------------|
| <b>NeVa M1S</b>              | 4.0 mm                    | 35 mm                   | 22 mm                             | M1, M2 of the MCA, basilar artery, or intracranial vertebral artery      | 2.0 – 3.5 mm                      |
| <b>NeVa T-3S</b>             | 4.5 mm                    | 42 mm                   | 30 mm                             | Carotid T occlusions, proximal M1 MCA, basilar or intracranial vertebral | 2.0 – 4.5 mm                      |
| <b>NeVa 5.5 x 37 mm</b>      | 5.5 mm                    | 56 mm                   | 37 mm                             | ICA, basilar or intracranial vertebral                                   | 3.5 – 5.5 mm                      |

**Supplementary Table 4. Reasons for Exclusion from mITT Population**

| <b>Reason</b>                                         | <b>Number of Events</b> | <b>Number of Subjects with an Event</b> |
|-------------------------------------------------------|-------------------------|-----------------------------------------|
| <b>Major Protocol Deviations</b>                      | 23                      | 20 (14.4%)                              |
| Inclusion/Exclusion criteria not met*                 | 23                      | 20 (14.4%)                              |
| Missing eTICI Score                                   | 0                       | 0 (0.0%)                                |
| Missing Primary Efficacy Assessment                   | 0                       | 0 (0.0%)                                |
|                                                       |                         |                                         |
| <b>Use of non-mITT NeVa Device for the First Pass</b> | 12                      | 12 (8.6%)                               |

\* Major protocol deviations (PDs) were reported for 20 subjects (14.4%) and involved subjects not meeting eligibility criteria. Note, three subjects did not meet two eligibility criteria.

The following inclusion criteria were not met:

- Signs/symptoms consistent with acute ischemic stroke, and either received IV t-PA within 3 hours of symptom onset, failed IV t-PA or was contraindicated to IV t-PA (n=6)
- Age  $\geq 18$  and  $\leq 85$  years (n=2)
- NIHSS score  $\geq 8$  and  $\leq 25$  (n=4)
- Pre-stroke mRS score of  $\leq 1$  (n=1)
- Able to initiate thrombectomy within 8 hours of TLKW with  $\geq$  one NeVa pass within 8 hours (n=4)
- ASPECTS 6-10, CT perfusion core  $\leq 50$  cc or MRI DWI core  $\leq 50$  cc (n=2)

The following exclusion criteria were not met:

- Bilateral stroke or stroke in multiple territories (n=1)
- Active malignancy (n=3)

**Supplementary Table 51. Study Procedure Characteristics**

| <b>Parameter</b>                                                                                  | <b>ITT/Safety<br/>(N = 139)</b> | <b>mITT<br/>(N = 107)</b> |
|---------------------------------------------------------------------------------------------------|---------------------------------|---------------------------|
| <b>Side of Lesion</b>                                                                             |                                 |                           |
| Left                                                                                              | 71 (51.1%)                      | 57 (53.3%)                |
| Right                                                                                             | 66 (47.5%)                      | 49 (45.8%)                |
| N/A (Basilar)                                                                                     | 2 (1.4%)                        | 1 (0.9%)                  |
|                                                                                                   |                                 |                           |
| <b>Vessel Location of Primary Occlusive Lesion on DSA</b>                                         |                                 |                           |
| Intracranial ICA                                                                                  | 14 (10.1%)                      | 10 (9.3%)                 |
| MCA-M1                                                                                            | 86 (61.9%)                      | 66 (61.7%)                |
| MCA-M2                                                                                            | 37 (26.6%)                      | 30 (28.0%)                |
| Basilar                                                                                           | 1 (0.7%)                        | 1 (0.9%)                  |
| PCA                                                                                               | 1 (0.7%)                        | 0 (0.0%)                  |
|                                                                                                   |                                 |                           |
| <b>Use of General Anesthesia</b>                                                                  |                                 |                           |
| Yes                                                                                               | 51 (36.7%)                      | 43 (40.2%)                |
| No                                                                                                | 88 (63.3%)                      | 64 (59.8%)                |
|                                                                                                   |                                 |                           |
| <b>Endovascular Procedure Access <sup>[1]</sup></b>                                               |                                 |                           |
| Femoral                                                                                           | 133 (95.7%)                     | 103 (96.3%)               |
| Radial                                                                                            | 8 (5.8%)                        | 6 (5.6%)                  |
| Brachial                                                                                          | 0 (0.0%)                        | 0 (0.0%)                  |
| Direct Carotid                                                                                    | 0 (0.0%)                        | 0 (0.0%)                  |
|                                                                                                   |                                 |                           |
| <b>Significant (&gt;70%) Extra-Cranial Stenosis Proximal to Primary Arterial Occlusive Lesion</b> |                                 |                           |
| Yes                                                                                               | 2 (1.4%)                        | 0 (0.0%)                  |
| No                                                                                                | 137 (98.6%)                     | 107 (100.0%)              |
|                                                                                                   |                                 |                           |
| <b>Duration of Procedure (minutes)</b>                                                            |                                 |                           |
| n                                                                                                 | 139                             | 107                       |

| <b>Parameter</b>                                                        | <b>ITT/Safety<br/>(N = 139)</b> | <b>mITT<br/>(N = 107)</b> |
|-------------------------------------------------------------------------|---------------------------------|---------------------------|
| Mean (SD)                                                               | 41.8 (28.7)                     | 41.6 (29.2)               |
| Median                                                                  | 35.0                            | 32.0                      |
| Min, Max                                                                | 2.0, 156.0                      | 2.0, 156.0                |
|                                                                         |                                 |                           |
| <b>Complications (during any pass)</b>                                  |                                 |                           |
| Yes                                                                     | 16 (11.5%)                      | 14 (13.1%)                |
| No                                                                      | 123 (88.5%)                     | 93 (86.9%)                |
|                                                                         |                                 |                           |
| <b>Use of Rescue Therapy/Device</b>                                     |                                 |                           |
| Yes                                                                     | 5 (3.6%)                        | 4 (3.7%)                  |
| No                                                                      | 134 (96.4%)                     | 103 (96.3%)               |
|                                                                         |                                 |                           |
| <b>Use of Heparin or Antiplatelet Medications<br/>(during any pass)</b> |                                 |                           |
| Yes                                                                     | 29 (20.9%)                      | 26 (24.3%)                |
| No                                                                      | 110 (79.1%)                     | 81 (75.7%)                |
|                                                                         |                                 |                           |
| <b>Flow Control Strategies (during any pass) <sup>[1]</sup></b>         |                                 |                           |
| BGC                                                                     | 41 (29.5%)                      | 31 (29.0%)                |
| Local Aspiration                                                        | 110 (79.1%)                     | 86 (80.4%)                |
| None                                                                    | 9 (6.5%)                        | 7 (6.5%)                  |
|                                                                         |                                 |                           |
| <b>Devices Used <sup>[2]</sup></b>                                      |                                 |                           |
| <b>First Pass</b>                                                       | 139 (100.0%)                    | 107 (100.0%)              |
| NeVa M1S                                                                | 41/139 (29.5%)                  | 32/107 (29.9%)            |
| NeVa 5.5 x 37 mm                                                        | 14/139 (10.1%)                  | 11/107 (10.3%)            |
| NeVa T-3S                                                               | 72/139 (51.8%)                  | 64/107 (59.8%)            |
| NeVa Other                                                              | 12/139 (8.6%)                   | 0/107 (0.0%)              |
| Other Stent Retriever                                                   | 0/139 (0.0%)                    | 0/107 (0.0%)              |
| Aspiration Only                                                         | 0/139 (0.0%)                    | 0/107 (0.0%)              |
|                                                                         |                                 |                           |
| <b>Second Pass</b>                                                      | 59 (42.4%)                      | 41 (38.3%)                |

| <b>Parameter</b>            | <b>ITT/Safety<br/>(N = 139)</b> | <b>mITT<br/>(N = 107)</b> |
|-----------------------------|---------------------------------|---------------------------|
| NeVa M1S                    | 12/59 (20.3%)                   | 7/41 (17.1%)              |
| NeVa 5.5 x 37 mm            | 3/59 (5.1%)                     | 2/41 (4.9%)               |
| NeVa T-3S                   | 27/59 (45.8%)                   | 25/41 (61.0%)             |
| NeVa Other                  | 6/59 (10.2%)                    | 0/41 (0.0%)               |
| Other Stent Retriever       | 8/59 (13.6%)                    | 5/41 (12.2%)              |
| Aspiration Only             | 2/59 (3.4%)                     | 2/41 (4.9%)               |
| Other: Balloon PTA          | 1/59 (1.7%)                     | 0/41 (0.0%)               |
|                             |                                 |                           |
| <b>Third Pass</b>           | 33 (23.7%)                      | 25 (23.4%)                |
| NeVa M1S                    | 7/33 (21.2%)                    | 6/25 (24.0%)              |
| NeVa 5.5 x 37 mm            | 1/33 (3.0%)                     | 1/25 (4.0%)               |
| NeVa T-3S                   | 11/33 (33.3%)                   | 10/25 (40.0%)             |
| NeVa Other                  | 4/33 (12.1%)                    | 0/25 (0.0%)               |
| Other Stent Retriever       | 8/33 (24.2%)                    | 6/25 (24.0%)              |
| Aspiration Only             | 1/33 (3.0%)                     | 1/25 (4.0%)               |
| Other: Self-Expanding Stent | 1/33 (3.0%)                     | 1/25 (4.0%)               |
|                             |                                 |                           |
| <b>Fourth Pass</b>          | 18 (12.9%)                      | 15 (14.0%)                |
| NeVa M1S                    | 3/18 (16.7%)                    | 3/15 (20.0%)              |
| NeVa 5.5 x 37 mm            | 0/18 (0.0%)                     | 0/15 (0.0%)               |
| NeVa T-3S                   | 2/18 (11.1%)                    | 1/15 (6.7%)               |
| NeVa Other                  | 1/18 (5.6%)                     | 0/15 (0.0%)               |
| Other Stent Retriever       | 9/18 (50.0%)                    | 8/15 (53.3%)              |
| Aspiration Only             | 2/18 (11.1%)                    | 2/15 (13.3%)              |
| Other: Microcatheter        | 1/18 (5.6%)                     | 1/15 (6.7%)               |
|                             |                                 |                           |
| <b>Fifth Pass</b>           | 9 (6.5%)                        | 7 (6.5%)                  |
| NeVa M1S                    | 0/9 (0.0%)                      | 0/7 (0.0%)                |
| NeVa 5.5 x 37 mm            | 0/9 (0.0%)                      | 0/7 (0.0%)                |
| NeVa T-3S                   | 0/9 (0.0%)                      | 0/7 (0.0%)                |
| NeVa Other                  | 0/9 (0.0%)                      | 0/7 (0.0%)                |
| Other Stent Retriever       | 8/9 (88.9%)                     | 6/7 (85.7%)               |



| <b>Parameter</b>      | <b>ITT/Safety<br/>(N = 139)</b> | <b>mITT<br/>(N = 107)</b> |
|-----------------------|---------------------------------|---------------------------|
| Aspiration Only       | 1/9 (11.1%)                     | 1/7 (14.3%)               |
|                       |                                 |                           |
| <b>Sixth Pass</b>     | 4 (2.9%)                        | 2 (1.9%)                  |
| NeVa M1S              | 0/4 (0.0%)                      | 0/2 (0.0%)                |
| NeVa 5.5 x 37 mm      | 0/4 (0.0%)                      | 0/2 (0.0%)                |
| NeVa T-3S             | 0/4 (0.0%)                      | 0/2 (0.0%)                |
| NeVa Other            | 0/4 (0.0%)                      | 0/2 (0.0%)                |
| Other Stent Retriever | 3/4 (75.0%)                     | 1/2 (50.0%)               |
| Aspiration Only       | 1/4 (25.0%)                     | 1/2 (50.0%)               |

[1] Subjects could be counted in more than one category (i.e., multiple options could have been selected for each subject).

[2] Summary of devices used according to data collected in EDC.

**Supplementary Table 6. Primary Endpoint Subgroup Analyses in mITT Population**

| Subgroup                                                                 | Core Lab                                                         |                        |
|--------------------------------------------------------------------------|------------------------------------------------------------------|------------------------|
|                                                                          | Successful Recanalization <sup>[1]</sup><br>n (%) <sup>[2]</sup> | P-value <sup>[3]</sup> |
| <b>Sex</b>                                                               |                                                                  | 0.042                  |
| Male (n = 62)                                                            | 53 (85.5%)                                                       |                        |
| Female (n = 45)                                                          | 44 (97.8%)                                                       |                        |
|                                                                          |                                                                  |                        |
| <b>Vessel Location of Primary Occlusive Lesion</b>                       |                                                                  | 0.90                   |
| Basilar (n = 1)                                                          | 1 (100.0%)                                                       |                        |
| Intracranial ICA (n = 10)                                                | 9 (90.0%)                                                        |                        |
| MCA-M1 (n = 66)                                                          | 59 (89.4%)                                                       |                        |
| MCA-M2 (n = 30)                                                          | 28 (93.3%)                                                       |                        |
|                                                                          |                                                                  |                        |
| <b>NeVa Device Model Used at First Pass</b>                              |                                                                  | 0.88                   |
| NeVa 5.5 x 37 mm (n = 11)                                                | 10 (90.9%)                                                       |                        |
| NeVa M1S (n = 32)                                                        | 30 (93.8%)                                                       |                        |
| NeVa T-3S (n = 64)                                                       | 57 (89.1%)                                                       |                        |
|                                                                          |                                                                  |                        |
| <b>Use of IV Tissue Plasminogen Activator (tPA)</b>                      |                                                                  | 1.00                   |
| Yes (n = 59)                                                             | 53 (89.8%)                                                       |                        |
| No (n = 48)                                                              | 44 (91.7%)                                                       |                        |
|                                                                          |                                                                  |                        |
| <b>Use of Ancillary Devices (Flow Control Strategies) <sup>[4]</sup></b> |                                                                  | 0.56                   |
| Yes (n = 99)                                                             | 90 (90.9%)                                                       |                        |
| No (n = 8)                                                               | 7 (87.5%)                                                        |                        |
|                                                                          |                                                                  |                        |
| <b>Use of Heparin or Antiplatelet Medications <sup>[4]</sup></b>         |                                                                  | 0.22                   |
| Yes (n = 23)                                                             | 19 (82.6%)                                                       |                        |
| No (n = 84)                                                              | 78 (92.9%)                                                       |                        |

|                            | Core Lab                                                         |                        |
|----------------------------|------------------------------------------------------------------|------------------------|
| Subgroup                   | Successful Recanalization <sup>[1]</sup><br>n (%) <sup>[2]</sup> | P-value <sup>[3]</sup> |
|                            |                                                                  |                        |
| <b>Geographic Location</b> |                                                                  | 0.50                   |
| U.S. (n = 73)              | 65 (89.0%)                                                       |                        |
| Non-U.S. (n = 34)          | 32 (94.1%)                                                       |                        |

[1] Result of an eTICI grade  $\geq 2b$  after 3 passes or less without the use of a rescue device.

[2] Number and percentage of subjects who achieved a successful recanalization within each subgroup category.

[3] P-value is from a Fisher's exact test.

[4] During the first 3 passes.

**Supplementary Table 7. Overview of CEC Adverse Event Adjudications (ITT/Safety population)**

| <b>Number of AEs:</b>                                 | <b>Number of Events</b> | <b>Number of Subjects<sup>[1]</sup><br/>(N=139)</b> |
|-------------------------------------------------------|-------------------------|-----------------------------------------------------|
| Any Serious AE                                        | 25                      | 20 (14.4%)                                          |
|                                                       |                         |                                                     |
| Serious AE related to procedure <sup>[2]</sup>        | 8                       | 8 (5.8%)                                            |
|                                                       |                         |                                                     |
| Serious AE related to NeVa device <sup>[2]</sup>      | 6                       | 6 (4.3%)                                            |
|                                                       |                         |                                                     |
| Serious AE related to ancillary device <sup>[2]</sup> | 4                       | 4 (2.9%)                                            |
|                                                       |                         |                                                     |
| Serious AE leading to study discontinuation           | 13                      | 13 (9.4%)                                           |

[1] Subjects reporting more than one serious adverse event are counted only once.

[2] Related events include those reported as 'Possibly Related' and 'Definitely Related'.

**Supplementary Table 8. CEC Adjudicated Serious Adverse Events – Relatedness (ITT/Safety population)**

| <b>Serious Adverse Events</b>          | <b>Number of Events</b> | <b>Number of Subjects (N=139)</b> |
|----------------------------------------|-------------------------|-----------------------------------|
| Number of Events                       | 25                      | 20 (14.4%)                        |
| Relation to Procedure                  |                         |                                   |
| Definitely not related to procedure    | 17                      | 16 (11.5%)                        |
| Possibly related to procedure          | 1                       | 1 (0.7%)                          |
| Definitely related to procedure        | 7                       | 7 (5.0%)                          |
| Relation to NeVa                       |                         |                                   |
| Definitely not related to NeVa         | 19                      | 17 (12.2%)                        |
| Possibly related to NeVa               | 5                       | 5 (3.6%)                          |
| Definitely related to NeVa             | 1                       | 1 (0.7%)                          |
| Relation to Other Device               |                         |                                   |
| Definitely not related to Other Device | 0                       | 0 (0.0%)                          |
| Possibly related to Other Device       | 4                       | 4 (2.9%)                          |
| Definitely related to Other Device     | 0                       | 0 (0.0%)                          |

**Supplementary Table 9. CEC Adjudicated Adverse Events - Summary (ITT/Safety population)**

| <b>AE Term</b>                                                                  | <b>Number of Events</b> | <b>Number of Subjects (N=139)</b> |
|---------------------------------------------------------------------------------|-------------------------|-----------------------------------|
| Access Site Complication requiring surgical repair or blood transfusion         | 1                       | 1 (0.7%)                          |
| Asymptomatic Subarachnoid Hemorrhage ≤ 24 hours                                 | 1                       | 1 (0.7%)                          |
| COVID-19                                                                        | 1                       | 1 (0.7%)                          |
| Cardiac Arrest                                                                  | 4                       | 4 (2.9%)                          |
| Cerebral Edema                                                                  | 2                       | 2 (1.4%)                          |
| Cerebral and Pulmonary Edema                                                    | 1                       | 1 (0.7%)                          |
| Device Failure (in vivo breakage)                                               | 0                       | 0 (0.0%)                          |
| Embolization to a new territory                                                 | 1                       | 1 (0.7%)                          |
| Intra-Procedural Mortality                                                      | 0                       | 0 (0.0%)                          |
| Multiorgan Failure                                                              | 1                       | 1 (0.7%)                          |
| Myocardial Infarction                                                           | 1                       | 1 (0.7%)                          |
| New Stroke Post-Discharge                                                       | 2                       | 2 (1.4%)                          |
| Pulmonary Embolism                                                              | 1                       | 1 (0.7%)                          |
| Seizure                                                                         | 1                       | 1 (0.7%)                          |
| Sepsis                                                                          | 1                       | 1 (0.7%)                          |
| Symptomatic Intraparenchymal Hemorrhage ≤ 24 hours                              | 1                       | 1 (0.7%)                          |
| Symptomatic Subarachnoid Hemorrhage ≤ 24 hours                                  | 2                       | 2 (1.4%)                          |
| Vascular Perforation causing Symptomatic Intraparenchymal Hemorrhage ≤ 24 hours | 1                       | 1 (0.7%)                          |
| Vasospasm                                                                       | 2                       | 2 (1.4%)                          |
| Ventricular Fibrillation                                                        | 1                       | 1 (0.7%)                          |

**Supplementary Table 10. Safety Endpoint ITT and mITT Populations**

| <b>Measurement</b>                                                                         | <b>ITT (N=139)</b> | <b>mITT (N=107)</b> |
|--------------------------------------------------------------------------------------------|--------------------|---------------------|
| Percent of Subjects deceased at Day 90 and/or experiencing sICH at 24 Hours Post Procedure | 17 (12.2%)         | 10 (9.3%)           |
| 95% Confidence Interval                                                                    | 7.8%, 18.7%        | 5.2%, 16.4%         |
|                                                                                            |                    |                     |
| Percent of Subjects deceased at Day 90                                                     | 13 (9.4%)          | 7 (6.5%)            |
| 95% Confidence Interval                                                                    | 5.5%, 15.3%        | 3.2%, 12.9%         |
|                                                                                            |                    |                     |
| Percent of Subjects experiencing sICH at 24 Hours Post Procedure                           | 7 (5.0%)           | 5 (4.7%)            |
| 95% Confidence Interval                                                                    | 2.5%, 10.0%        | 2.0%, 10.5%         |
|                                                                                            |                    |                     |
| Percent of Subjects with $\geq$ 4-point increase in NIHSS score at 24-Hours Post-Procedure | 7 (5.0%)           | 6 (5.6%)            |
| 95% Confidence Interval                                                                    | 2.5%, 10.0%        | 2.6%, 11.7%         |
|                                                                                            |                    |                     |
| Percent of Subjects with $\geq$ 4-point increase in NIHSS score at day 5-10/Discharge      | 4 (2.9%)           | 2 (1.9%)            |
| 95% Confidence Interval                                                                    | 1.1%, 7.2%         | 0.5%, 6.6%          |

**Supplementary Table 11. Patient characteristics in CLEAR and comparator device registration trials**

|                                                         | <b>CLEAR mITT<br/>(n=107)</b> | <b>TIGER Main<br/>Study<br/>(n=117)</b> | <b>ARISE II<br/>(n=227)</b> | <b>TREVO 2<br/>(n=88)</b> | <b>SWIFT<br/>(N=58)</b> |
|---------------------------------------------------------|-------------------------------|-----------------------------------------|-----------------------------|---------------------------|-------------------------|
| Age, y; mean (SD)                                       | 65.1 (13.2)                   | 65 (15)                                 | 68 (13)                     | 67 (14)                   | 67 (12)                 |
| NIHSS; median (IQR)                                     | 16 (12-20)                    | 17 (12-21)                              | 16 (12-19)                  | 19 (14-21)                | 18 (9-28)               |
| Baseline ASPECTS; median (IQR)                          | 9 (8-10)                      | 9 (8-10)                                | 9 (9-10)                    | NR                        | NR                      |
| Prestroke mRS 0-1 (%)                                   | 100%                          | 99.2%                                   | 100% (mRS 0-2)              | 100%                      | 96% (mRS 0-2)           |
| IV tPA failure (%)                                      | 55.1%                         | 65.8%                                   | 52.9%                       | 58%                       | 33%                     |
| Proximal occlusion location (%)                         |                               |                                         |                             |                           |                         |
| ICA                                                     | 9.3%                          | 20.5%                                   | 15.4%                       | 16%                       | 21%                     |
| M1 MCA                                                  | 61.7%                         | 57.3%                                   | 55.5%                       | 60%                       | 66%                     |
| M2 MCA                                                  | 28.0%                         | 19.7%                                   | 25.1%                       | 16%                       | 10%                     |
| Basilar                                                 | 0.9%                          | 2.6%                                    | 4%                          | 8%                        | 2%                      |
| Last known well to arterial puncture, min; median (IQR) | 181 (131-252)                 | 172 (128.3-273)                         | 214 (155-266)               | 282 (210-342)             | 293.5 (85.6)            |
| Procedural aspects (%)                                  |                               |                                         |                             |                           |                         |
| BGC only                                                | 14.4%                         | 21.4%                                   | 73.6%                       | NR                        | NR                      |
| BGC + intermediate catheter                             | 15.1%                         | 8.5%                                    | NR                          | NR                        | NR                      |
| Intermediate catheter only                              | 64.0%                         | 17.9%                                   | 41%                         | NR                        | NR                      |

Abbreviations: BGC, balloon guide catheter; ICA, internal carotid artery; M1, main segment; M2, second order branch; MCA, middle cerebral artery; NR, not reported; tPA, tissue plasminogen activator
